# Supplementary material for: Quantitative analysis of subcellular distributions with an open-source, object-based tool
Source: PubMed Central journal article supplement (PMC7595693; doi:10.1242/bio.055228), 2020-10-19
Supplement: biolopen-9-055228-s1.pdf [file biolopen-9-055228-s1.pdf]

Table S1: List of smFISH probes

[Click here to Download Table S1](#)
